# Supplementary material for: The voluntary control of piloerection
Source: PeerJ. 2018 Jul 30;6:e5292. doi: 10.7717/peerj.5292 (PMC6071615; doi:10.7717/peerj.5292)
Supplement: Supplemental Information 1 [file peerj-06-5292-s002.xlsx]

## Sheet: Sheet1
ID	ResponseID
IPAddress	IPAddress
StartDate	StartDate
EndDate	EndDate
Consent	Endorsement of consent form
Age	How old are you?
Age_discovered	How old were you when you discovered you could give yourself goosebumps? (Approximate is OK)
DiscovertyDescription	(Optional) Please briefly describe the situation you were in when you first discovered that you c...
Sex_Biological	What is your biological sex?
GB_begin_head_top_or_sides	Choose from the following list the sites where the sensation of goosebumps typically begins (more...-Top or sides of head inc. ears
GB_begin_head_back	Choose from the following list the sites where the sensation of goosebumps typically begins (more...- Back of head/neck
GB_begin_shoulders	Choose from the following list the sites where the sensation of goosebumps typically begins (more...- Shoulders
GB_begin_upper_back	Choose from the following list the sites where the sensation of goosebumps typically begins (more...- Upper back
GB_begin_lower_back	Choose from the following list the sites where the sensation of goosebumps typically begins (more...- Lower back
GB_begin_chest_or_abdomen	Choose from the following list the sites where the sensation of goosebumps typically begins (more...- Chest/abdomen
GB_begin_crotch	Choose from the following list the sites where the sensation of goosebumps typically begins (more...- Crotch
GB_begin_arms	Choose from the following list the sites where the sensation of goosebumps typically begins (more...- Arms
GB_begin_legs	Choose from the following list the sites where the sensation of goosebumps typically begins (more...- Legs
GB_begin_hands	Choose from the following list the sites where the sensation of goosebumps typically begins (more...- Hands
GB_begin_feet	Choose from the following list the sites where the sensation of goosebumps typically begins (more...- Feet
GB_begin_other	Choose from the following list the sites where the sensation of goosebumps typically begins (more...-Other
GB_begin_other_text	Choose from the following list the sites where the sensation of goosebumps typically begins (more...-Other-TEXT
GB_location_head_top_or_sides	Check off ALL the sites where you typically experience goosebumps (more than one may apply)-Top or sides of head inc. ears
GB_location_head_back	Check off ALL the sites where you typically experience goosebumps (more than one may apply)-Back of head/neck
GB_location_shoulders	Check off ALL the sites where you typically experience goosebumps (more than one may apply)- Shoulders
GB_location_upper_back	Check off ALL the sites where you typically experience goosebumps (more than one may apply)- Upper back
GB_location_lower_back	Check off ALL the sites where you typically experience goosebumps (more than one may apply)- Lower back
GB_location_chest_or_abdomen	Check off ALL the sites where you typically experience goosebumps (more than one may apply)-Chest/abdomen
GB_location_crotch	Check off ALL the sites where you typically experience goosebumps (more than one may apply)-Crotch
GB_location_arms	Check off ALL the sites where you typically experience goosebumps (more than one may apply)- Arms
GB_location_legs	Check off ALL the sites where you typically experience goosebumps (more than one may apply)- Legs
GB_location_hands	Check off ALL the sites where you typically experience goosebumps (more than one may apply)- Hands
GB_location_feet	Check off ALL the sites where you typically experience goosebumps (more than one may apply)- Feet
GB_location_other	Check off ALL the sites where you typically experience goosebumps (more than one may apply)-Other:
GB_location_other_text	Check off ALL the sites where you typically experience goosebumps (more than one may apply)-Other:-TEXT
GB_strongest_head_top_or_sides	Where is the sensation strongest or most noticeable? (more than one may apply)-Top or sides of head inc. ears
GB_strongest_head_back	Where is the sensation strongest or most noticeable? (more than one may apply)- Back of head/neck
GB_strongest_shoulders	Where is the sensation strongest or most noticeable? (more than one may apply)- Shoulders
GB_strongest_upper_back	Where is the sensation strongest or most noticeable? (more than one may apply)- Upper back
GB_strongest_lower_back	Where is the sensation strongest or most noticeable? (more than one may apply)- Lower back
GB_strongest_chest_or_abdomen	Where is the sensation strongest or most noticeable? (more than one may apply)- Chest/abdomen
GB_strongest_crotch	Where is the sensation strongest or most noticeable? (more than one may apply)- Crotch
GB_strongest_arms	Where is the sensation strongest or most noticeable? (more than one may apply)- Arms
GB_strongest_legs	Where is the sensation strongest or most noticeable? (more than one may apply)- Legs
GB_strongest_hands	Where is the sensation strongest or most noticeable? (more than one may apply)- Hands
GB_strongest_feet	Where is the sensation strongest or most noticeable? (more than one may apply)- Feet
GB_strongest_other	Where is the sensation strongest or most noticeable? (more than one may apply)-Other:
GB_strongest_other_text	Where is the sensation strongest or most noticeable? (more than one may apply)-Other:-TEXT
GB_onset_time	How long does it take the 'goosebump' response to start after you initiate it?
GB_on_till_off_time	Say you turned your goosebumps all the way on and then all the way off again. How long would that...
GB_location_control	Can you control the location of the goosebumps?
GB_sidedness1	Do your goosebumps demonstrate 'sidedness'? As in, are they ever stronger, more noticeable or dif...
GB_sidedness2	Do you find it harder to create goosebumps on one side than the other?
GB_surprised	When you found out that other people typically cannot produce goosebumps at will, were you surpri...
GB_effort_required	How hard do you find the act of producing goosebumps?
GB_method	How do you produce the goosebumps?
GB_method_text	How do you produce the goosebumps?-TEXT
GB_possible_breathing_in	Can you produce goosebumps under the following situations? (select any that apply) You can try th...-While you're breathing in?
GB_possible_breathing_out	Can you produce goosebumps under the following situations? (select any that apply) You can try th...-While you're breathing out?
GB_possible_holding_breath	Can you produce goosebumps under the following situations? (select any that apply) You can try th...-While you're holding your breath?
GB_possible_lungs_empty	Can you produce goosebumps under the following situations? (select any that apply) You can try th...-While your lungs are empty?
GB_resp_easiest	Which of the following is easiest?
GB_freq_practice	How commonly have you practiced the ability to give yourself goosebumps?
GB_emo_awe_wonder	We are interested in the feelings and thoughts that accompany voluntarily induced goosebumps. Ple...-feel a sense of awe and wonder
GB_emo_touched	We are interested in the feelings and thoughts that accompany voluntarily induced goosebumps. Ple...-feel touched
GB_emo_feel_like_crying	We are interested in the feelings and thoughts that accompany voluntarily induced goosebumps. Ple...-feel like crying
GB_emo_absorption	We are interested in the feelings and thoughts that accompany voluntarily induced goosebumps. Ple...-feel absorbed and immersed
GB_emo_losetime	We are interested in the feelings and thoughts that accompany voluntarily induced goosebumps. Ple...-completely lose track of time
GB_emo_feel_elsewhere	We are interested in the feelings and thoughts that accompany voluntarily induced goosebumps. Ple...-feel like you are somewhere else
GB_emo_detatched	We are interested in the feelings and thoughts that accompany voluntarily induced goosebumps. Ple...-feel detached from your surroundings
GB_use_music	Do you ever use your ability to produce goosebumps in the following situations: (more than one ma...-listening to music
GB_use_TV	Do you ever use your ability to produce goosebumps in the following situations: (more than one ma...-watching films or TV series
GB_use_art	Do you ever use your ability to produce goosebumps in the following situations: (more than one ma...-viewing art
GB_use_literature	Do you ever use your ability to produce goosebumps in the following situations: (more than one ma...-reading literature, or poetry, or quotations
GB_use_creative	Do you ever use your ability to produce goosebumps in the following situations: (more than one ma...-during creative activities (e.g. painting)
GB_use_dance	Do you ever use your ability to produce goosebumps in the following situations: (more than one ma...-watching dance
GB_use_theater	Do you ever use your ability to produce goosebumps in the following situations: (more than one ma...-theater
GB_use_gaming	Do you ever use your ability to produce goosebumps in the following situations: (more than one ma...-playing computer games
GB_use_other	Do you ever use your ability to produce goosebumps in the following situations: (more than one ma...-other (please list any other activities)
GB_use_other_text	Do you ever use your ability to produce goosebumps in the following situations: (more than one ma...-other (please list any other activities)-TEXT
Most_freq_arts_area	Please think of an area of the arts (e.g. music, visual art, reading, watching dance etc) you enc...
Abs1	feel absorbed and immersed
Abs2Time	completely lose track of time
Chils1	feel chills down your spine
Chils2	get goose bumps
Abs5	feel like you’re somewhere else
Chills3	feel like your hair is standing on end
Touched2	feel like crying
Touched	feel touched
Abs3	feel detached from your surroundings
Abs4	feel a sense of awe and wonder
INVfreq	How often do you experience involuntary goosebumps?
INVelicitors	What stimuli or situations usually elicit involuntary goosebumps?
INVlengthen	Do you tend to make these experiences last longer by prolonging the goosebumps yourself?
PosNeg	Are these experiences generally positive or negative?
Personal_explanation_for_VGP	What's YOUR own explanation for being able to give yourself goosebumps?
Process_for_VGP	In your own words, describe the whole process of how you give yourself goosebumps.
E1	Extraverted TIPI
A1_R	Critical TIPI
C1	Dependable TIPI
N1	Anxious TIPI
O1	Open TIPI
E2_R	Reserved TIPI
A2	Sympathetic TIPI
C2_R	Disorganised TIPI
N2_R	Calm TIPI
O2_R	Conventional TIPI
I1	BFAS Intellect
Op1	BFAS Openness
I2_R	BFAS Intellect
Op2	BFAS Openness
I3	BFAS Intellect
Op3	BFAS Openness
I4	BFAS Intellect
Op4	BFAS Openness
I5_R	BFAS Intellect
Op5_R	BFAS Openness
I6_R	BFAS Intellect
Op6_R	BFAS Openness
I7	BFAS Intellect
Op7	BFAS Openness
I8	BFAS Intellect
Op8_R	BFAS Openness
I9_R	BFAS Intellect
Op9_R	BFAS Openness
I10	BFAS Intellect
Op10	BFAS Openness
LocationLatitude	LocationLatitude
LocationLongitude	LocationLongitude
Chills	Aesthetic experiences scale - chills total
Moved	Aesthetic experiences scale - moved total
Absorbed	Aesthetic experiences scale - absorbed total
Openness	BFAS Openness total
Intellect	BFAS Intellect total
Openness_Intellect	BFAS Openness/Intellect total
E	TIPI extraversion
A	TIPI agreeableness
C	TIPI conscientiousness
ES	TIPI emotional stability
O	TIPI openness
